# Supplementary material for: The Pid Family Has Been Diverged into Xian and Geng Type Resistance Genes against Rice Blast Disease
Source: MDPI journal article supplement (doi:10.3390/genes13050891), 2022-05-17
Supplement: s1 [file s1]

**Table S1.** The three comprehensive FNP marker systems for deeper allele mining, and the primers and markers for transformation test of the *Pid* family.

| Gene (accession number) /<br>Marker name /<br>Primer sequence (5'→3') <sup>a</sup> | Annealing<br>temp (°C) <sup>b</sup> | Restriction<br>enzyme (°C) <sup>c</sup> | Expected<br>size (bp) <sup>d</sup> |
|------------------------------------------------------------------------------------|-------------------------------------|-----------------------------------------|------------------------------------|
| <b>Set I. <i>Pid2</i> (FJ915121.1)</b>                                             |                                     |                                         |                                    |
| <b>Pid2-F/N<sup>C1022T</sup></b>                                                   | 62                                  | <i>Taq</i> I (65)                       | 109/85                             |
| F: acagttccggcagactcttgtagacat                                                     |                                     |                                         |                                    |
| R: agtttgcaaacgagccgagggtc                                                         |                                     |                                         |                                    |
| <b>Pid2-F/N<sup>A1383G</sup></b>                                                   | 56                                  | <i>Mlu</i> I (37)                       | 126/104                            |
| F: ggaatacaactcgtttcgcattc                                                         |                                     |                                         |                                    |
| R: ctatgatagccaaagttacgcg                                                          |                                     |                                         |                                    |
| <b>Pid2-DIG<sup>T2058C</sup></b>                                                   | 58                                  | <i>Hha</i> I (37)                       | 226/174                            |
| F: agttgatgaccaggagcaga                                                            |                                     |                                         |                                    |
| R: cttctccagcttcttgaa                                                              |                                     |                                         |                                    |
| <b>Pid2-ZS<sup>A555G</sup></b>                                                     | 53                                  | <i>Hpa</i> II (37)                      | 111/88                             |
| F: gccacctctatgcaactactg                                                           |                                     |                                         |                                    |
| R: accagacagaagagtgtctgc                                                           |                                     |                                         |                                    |
| <b>Set II. <i>Pid3</i> (FJ745364.1)</b>                                            |                                     |                                         |                                    |
| <b>Pid3-F/N<sup>G2009A</sup></b>                                                   | 58                                  | <i>Bsl</i> I (55)                       | 138/104                            |
| F: gcagtcgttggttctaagcaatttg                                                       |                                     |                                         |                                    |
| R: cacaagagagcctaggtgatgaac                                                        |                                     |                                         |                                    |
| <b>Pid3-F/N<sup>C2209T</sup></b>                                                   | 62                                  | <i>Bam</i> HI (37)                      | 216/145                            |
| F: aaggtgcgaagttgccattgt                                                           |                                     |                                         |                                    |
| R: cgtgaggttattcagattgcttacag                                                      |                                     |                                         |                                    |
| <b>Pid3-DIG<sup>G775A</sup></b>                                                    | 56                                  | <i>Bsr</i> I (65)                       | 138/102                            |
| F: aagagtttcgcaagaatgatcgg                                                         |                                     |                                         |                                    |
| R: cattccatacatcatctaggacaagg                                                      |                                     |                                         |                                    |
| <b>Pid3-DIG<sup>G2695A</sup></b>                                                   | 58                                  | <i>Hpy</i> 99I (37)                     | 148/121                            |
| F: atctgaagttcctgctctgtccaa                                                        |                                     |                                         |                                    |
| R: acgtcacaatcattcgtct                                                             |                                     |                                         |                                    |
| <b>Pid3-TTP<sup>C1136T</sup></b>                                                   | 57                                  | <i>Apa</i> LI (37)                      | 110/85                             |
| F: aatgagataaggaattgtccgccg                                                        |                                     |                                         |                                    |
| R: aatgacagaaggcgtccaatgtgc                                                        |                                     |                                         |                                    |
| <b>Pid3-TTP<sup>C1623G</sup></b>                                                   | 60                                  | <i>Dde</i> I (37)                       | 120/102                            |
| F: agcacgccgtttatcaactca                                                           |                                     |                                         |                                    |
| R: ggtaatgactgaagcgaactg                                                           |                                     |                                         |                                    |
| <b>Pid3-ZS<sup>G477A</sup></b>                                                     | 60                                  | <i>Mse</i> I (37)                       | 145/125                            |
| dF: gayrgcgggaaggaggagctt                                                          |                                     |                                         |                                    |
| R: cacactgaccaccatgcggc                                                            |                                     |                                         |                                    |
| <b>Pid3-ZS<sup>C525T</sup></b>                                                     | 62                                  | <i>Hpa</i> II (37)                      | 125/104                            |

F: caagagggaggatgagcttgc

R: ccgtcttgccgattccac

---

**Set III. *Pid4* (MG839283.1)**

**Pid4-F/N<sup>C1217G</sup>** 57 *Mnl* I (37) 107/73

F: cataattcaaaactgtgcttatccct

R: cctcataacttttatttgattttctca

**Pid4-F/N<sup>A1452G</sup>** 60 *Bsp* HI (37) 115/97

F: gcagctatcttcagggtcat

R: gctaaggtacagaaaacatggct

**Pid4-DIG<sup>A1149T</sup>** 53 *Xba* I (37) 160/136

F: ttaatgaatctgttttctgactctag

R: gattttctcagcagcaaatgttttagc

**Pid4-DIG<sup>A1898G</sup>** 62 *Bsr* I (65) 114/72

dF: gggagacaggaktcawacctaagc

R1: gagcatccttagctgtgtgaac

R2: gatcatccttagttgggacggac

**Pid4-NPB<sup>G1362A</sup>** 59 *Aci* I (37) 130/82

F: aggctgagaaggtgtttgata

R: gaagatagctgcagagacagt

**Pid4-NPB<sup>C1554A</sup>** 53 *Aci* I (37) 118/97

F1: ttctgtaccttagcattttccg

F2: ttctgtatcttagcgttttccg

R: caacatcctcatagccattcca

**Pid4-SN/CO<sup>T1841A</sup>** 57 *Hph* I (37) 195/161

F: catcaatagaagcatgattcaacc

R: tcctgtctcccatcaatagaag

**Pid4-SN/CO<sup>C2250G</sup>** 56 *Apa* I (25) 120/92

F1: gtcacttcgaatttactaccgtgg

F2: gatactccgatttcaatatctatgg

dR: ggaactcygccaccaccwscga

**Set IV. Transformation test**

***Pid2* cloning** 62 *Asc* I (37) 6,259

F: attggcgcgccgcatcaacatagacgtagcgtgg

R: attggcgcgccctagttacagatcactgtgccat

***Pid3* cloning** 62 *Asc* I (37) 6,237

F: attggcgcgcccacacattgtacacctacgaccac

R: attggcgcgccgaacgacaagtgcgacatgattg

**HYG** 58 *n/a* 879

F: cttctcgggcgatttgt

R: cagcgtctccgacctgat

|                               |    |            |       |
|-------------------------------|----|------------|-------|
| <b>Vector_F/Pid2_R</b>        | 56 | <i>n/a</i> | 4,738 |
| F: aattaattcctagggccaccatgttg |    |            |       |
| R: ctatgatagccaaagttagcg      |    |            |       |
| <b>Pid2_F/Vector_R</b>        | 56 | <i>n/a</i> | 2,114 |
| F: ggaatacaactcgtttcgcatt     |    |            |       |
| R: gtctggaccgatggctgtgtag     |    |            |       |
| <b>Vector_F/Pid3_R</b>        | 60 | <i>n/a</i> | 4,209 |
| F: aattaattcctagggccaccatgttg |    |            |       |
| R: aatgacagaaggcgtccaatgtgc   |    |            |       |
| <b>Pid3_F/Vector_R</b>        | 60 | <i>n/a</i> | 2,919 |
| F: aagagtttcgcaagaatgacgg     |    |            |       |
| R: gtctggaccgatggctgtgtag     |    |            |       |

<sup>a</sup> F, forward; R, reverse; PCR with multiple primers was designed with F1, F2, or R1, R2, if any; and degenerate primer sequences were labelled dF and dR, where r=a/g; w=a/t; k=g/t; s=c/g; and y=c/t. For transformation test, sequence unlined was responding to the common restriction enzyme *Asc* I for ligating fragments (resistance genes) into the binary vectors, pYLAC380H.

<sup>b</sup> Each PCR was initiated by a 94°C/3 min denaturation, followed by 35 cycles of 94°C/30 s, 50-62°C/30 s (temperature dependent on choice of primers), 72°C/25-30 s (time dependent on amplicon size) and a final extension step of 72°C/5 min. Amplicons were electrophoresed through a 10-12% polyacrylamide gel. For transformation test, each PCR was initiated by a 95°C/3 min denaturation, followed by 35 cycles of 95°C/15 s, 50-62°C/15 s, 72°C/2-8 min and a final extension step of 72°C/5 min. Amplicons were electrophoresed through a 1% agarose gel.

<sup>c</sup> The number shown in parentheses refers to the temperature at which the restriction digestion reaction was run.

<sup>d</sup> Only the critical bands were sized.
